# Supplementary material for: Role of Thylakoid Protein Phosphorylation in Energy-Dependent Quenching of Chlorophyll Fluorescence in Rice Plants
Source: MDPI journal article supplement (doi:10.3390/ijms22157978), 2021-07-26
Supplement: s1 [file s1]

# Role of Thylakoid Protein Phosphorylation in Energy-Dependent Quenching of Chlorophyll Fluorescence in Rice Plants

Aynura Pashayeva, Guangxi Wu, Irada Huseynova, Choon-Hwan Lee, Ismayil S. Zulfugarov

## Supplementary Tables S1~S6 for Figures 1~6

Supplementary Table S1 for Figure 1

| Bands          | WT       |            |            | PsbS-KO  |            |             |
|----------------|----------|------------|------------|----------|------------|-------------|
|                | Dark     | HL 10 min  | HL 1 h     | Dark     | HL 10 min  | HL 1 h      |
| <b>P-CP47</b>  | 0        | 0          | 0          | 0        | 1485±76    | 1621±92     |
| <b>P-CP43</b>  | 5446±354 | 8516±452** | 8716±481** | 4141±203 | 9474±468** | 10618±595** |
| <b>P-D1/D2</b> | 2788±182 | 5895±313** | 7549±425** | 1640±85  | 5680±274** | 9802±541**  |
| <b>P-LHCII</b> | 0        | 6614±351   | 2727±155** | 0        | 5130±256   | 5320±294    |

Supplementary Table S2a for Figure 2a

| Bands                                          | WT         |            |            | PsbS-KO   |            |            |
|------------------------------------------------|------------|------------|------------|-----------|------------|------------|
|                                                | Dark       | HL 10 min  | HL 1 h     | Dark      | HL 10 min  | HL 1 h     |
| <b>MC</b>                                      | 2017±163   | 2424±191*  | 2105±158   | 2352±162  | 1852±143*  | 2630±203*  |
| <b>C<sub>2</sub>S<sub>2</sub>M<sub>2</sub></b> | 1958±159   | 1877±148   | 2205±165*  | 1918±132  | 1847±142   | 1092±84**  |
| <b>C<sub>2</sub>S<sub>2</sub>M</b>             | 2887±234   | 2357±186*  | 1750±131** | 2110±146  | 2308±178*  | 914±70*    |
| <b>C<sub>2</sub>S<sub>2</sub></b>              | 2879±233   | 2508±198*  | 1517±114** | 2472±171  | 2410±186   | 1935±149** |
| <b>C<sub>2</sub>S</b>                          | 3167±257   | 3441±272*  | 2273±170** | 2833±195  | 2574±198*  | 1571±121** |
| <b>PSI/PSII</b>                                | 9955±806   | 11223±887* | 10929±820  | 9940±686  | 9412±725   | 8522±656*  |
| <b>PSII</b>                                    | 4305±349   | 3406±269*  | 2566±192** | 2717±187  | 2572±198*  | 1620±125** |
|                                                | 0          | 0          | 0          | 0         | 0          | 0          |
| <b>CP24-CP29</b>                               | 5320±431   | 8382±662** | 8278±621** | 6214±429  | 5436±419*  | 7693±592*  |
| <b>LHCII trimer</b>                            | 11225±909  | 10783±852  | 9883±741   | 10511±725 | 10522±810  | 10554±813  |
| <b>LHCII monomer</b>                           | 122995±885 | 13172±948  | 13952±1005 | 13755±990 | 15265±1099 | 16215±1161 |

MC – Megacomplexes; PSI/PSII – PSI-LHCI/PSII core dimer; PSII – PSII core monomer/Cytb<sub>6</sub>f; CP24-CP29 – PSII-CP24-CP29.

Supplementary Table S2b for Figure 2b

| Bands                                          | WT       |            |            | PsbS-KO  |            |           |
|------------------------------------------------|----------|------------|------------|----------|------------|-----------|
|                                                | Dark     | HL 10 min  | HL 1 h     | Dark     | HL 10 min  | HL 1 h    |
| <b>MC</b>                                      | 8828±758 | 2760±351** | 6171±666*  |          | 3293±353*  | 5309±596* |
| <b>C<sub>2</sub>S<sub>2</sub>M<sub>2</sub></b> |          |            |            |          |            |           |
| <b>C<sub>2</sub>S<sub>2</sub>M</b>             |          | 1957±188*  | 3415±114*  |          | 2278±197*  | 4364±499* |
| <b>C<sub>2</sub>S<sub>2</sub></b>              |          | 2514±234   | 3495±322   |          | 2759±299*  | 3761±394* |
| <b>C<sub>2</sub>S</b>                          | 2663±255 | 3067±375   | 4168±386** |          | 4426±468*  | 5513±488* |
| <b>PSI/PSII</b>                                |          | 2793±272   | 3619±334   |          | 2285±267*  | 4681±519* |
| <b>PSII</b>                                    |          | 3289±383*  |            | 2115±270 |            |           |
|                                                |          | 6687±656*  | 10665±933* | 2643±255 | 4560±433** | 9274±822* |
| <b>CP24-</b>                                   |          |            |            |          |            |           |
| <b>CP29</b>                                    | 6513±586 |            | 2871±294*  |          |            | 2783±285* |
| <b>LHCII</b>                                   |          |            |            |          |            |           |
| <b>trimer</b>                                  | 2423±264 |            |            |          |            | 1595±114* |
| <b>LHCII</b>                                   |          |            |            |          |            |           |
| <b>monomer</b>                                 |          |            |            |          |            |           |

MC – Megacomplexes; PSI/PSII – PSI-LHCI/PSII core dimer; PSII – PSII core monomer/Cytb<sub>6</sub>f; CP24-CP29 – PSII-CP24-CP29.

Supplementary Table S3 for Figure 3

| Bands          | WT       |            |            | PsbS-KO  |            |            |
|----------------|----------|------------|------------|----------|------------|------------|
|                | Dark     | HL 10 min  | HL 1 h     | Dark     | HL 10 min  | HL 1 h     |
| <b>P-Lhcb1</b> | 5318±511 | 8581±824** | 1812±174** | 2868±275 | 9776±938** | 6900±662** |
| <b>P-Lhcb2</b> | 3829±369 | 9477±912** | 6039±580** | 547±33   | 9264±889** | 8289±796*  |

Supplementary Table S4a for Figure 4a

| Bands                                          | WT         |             |            | PsbS-KO    |            |            |
|------------------------------------------------|------------|-------------|------------|------------|------------|------------|
|                                                | Dark       | LL 10 min   | LL 1 h     | Dark       | LL 10 min  | LL 1 h     |
| <b>C<sub>2</sub>S<sub>2</sub>M<sub>2</sub></b> | 469±31     | 737±49*     | 849±56*    | 595±39     | 603±40     | 793±52*    |
| <b>C<sub>2</sub>S<sub>2</sub>M</b>             | 780±51     | 1133±95**   | 1553±102** | 976±64     | 909±93     | 1610±108** |
| <b>C<sub>2</sub>S<sub>2</sub></b>              | 839±55     | 1337±51**   | 1575±114** | 1237±82    | 1079±97*   | 1805±119** |
| <b>C<sub>2</sub>S</b>                          | 969±64     | 1088±73     | 1222±81*   | 1248±82    | 1179±78    | 1420±94*   |
| <b>PSI/PSII</b>                                | 3868±255   | 3381±223    | 3829±253   | 4080±269   | 3616±239*  | 3912±258   |
| <b>PSII</b>                                    | 1731±114   | 1512±113*   | 1127±74**  | 1327±88    | 1043±69*   | 813±54**   |
|                                                | 3560±235   | 3810±251*   | 3623±239   | 3993±264   | 3736±267*  | 4361±288** |
| <b>CP24-CP29 LHCII trimer</b>                  | 530±35     | 522±34      | 505±33     | 521±34     | 514±36     | 509±37     |
| <b>LHCII monomer</b>                           | 6804±449   | 5609±370    | 5814±384   | 6045±399   | 6239±412   | 6366±474   |
|                                                | 24905±1644 | 18456±1218* | 22103±1459 | 22179±1464 | 21025±1388 | 24162±1595 |

PSI/PSII – PSI-LHCI/PSII core dimer; PSII – PSII core monomer/Cytb<sub>6</sub>f; CP24-CP29 – PSII-CP24-CP29.

Supplementary Table S4b for Figure 4b

| Bands                                          | WT        |            |             | PsbS-KO    |            |             |
|------------------------------------------------|-----------|------------|-------------|------------|------------|-------------|
|                                                | Dark      | LL 10 min  | LL 1 h      | Dark       | LL 10 min  | LL 1 h      |
| <b>C<sub>2</sub>S<sub>2</sub>M<sub>2</sub></b> | 0         | 0          | 0           | 0          | 0          | 0           |
| <b>C<sub>2</sub>S<sub>2</sub>M</b>             | 0         | 0          | 0           | 0          | 0          | 494±39      |
| <b>C<sub>2</sub>S<sub>2</sub></b>              | 0         | 0          | 1287±102    | 1047±83    | 342±27**   | 3065±242**  |
| <b>C<sub>2</sub>S</b>                          | 0         | 0          | 4749±375    | 1326±105   | 980±77*    | 6404±506**  |
| <b>PSI/PSII</b>                                | 0         | 0          | 0           | 0          | 0          | 0           |
| <b>PSII</b>                                    | 0         | 0          | 0           | 0          | 0          | 0           |
|                                                | 12392±979 | 14629±1156 | 15170±1198* | 14463±1143 | 16432±1298 | 17781±1405* |
| <b>CP24-CP29 LHCII trimer</b>                  | 0         | 1665±132   | 1116±88*    | 921±73     | 1846±146*  | 4171±330**  |
| <b>LHCII monomer</b>                           | 0         | 0          | 0           | 0          | 0          | 0           |
|                                                | 939±74    | 506±40*    | 860±68      | 873±69     | 1540±122*  | 2052±162*   |
|                                                | 0         | 0          | 2477±196    | 1343±106   | 2342±185*  | 9595±758**  |

PSI/PSII – PSI-LHCI/PSII core dimer; PSII – PSII core monomer/Cytb<sub>6</sub>f; CP24-CP29 – PSII-CP24-CP29.

Supplementary Table S5a for Figure 5a

| Bands                                          | WT         |            |            | PsbS-KO    |            |            |
|------------------------------------------------|------------|------------|------------|------------|------------|------------|
|                                                | Dark       | LL 10 min  | LL 1 h     | Dark       | LL 10 min  | LL 1 h     |
| <b>MC</b>                                      | 2243±132   | 1941±111   | 2111±152   | 2163±149   | 19700±156  | 2406±166*  |
| <b>C<sub>2</sub>S<sub>2</sub>M<sub>2</sub></b> | 1267±75    | 743±42*    | 1280±92    | 1448±100   | 1195±94*   | 1179±81*   |
| <b>C<sub>2</sub>S<sub>2</sub>M</b>             | 1317±78    | 899±51*    | 1249±90    | 1483±102   | 1228±97    | 1305±90    |
| <b>C<sub>2</sub>S<sub>2</sub></b>              | 1087±64    | 578±33*    | 982±71     | 1077±74    | 956±76     | 923±64     |
| <b>C<sub>2</sub>S</b>                          | 844±50     | 798±45     | 678±49     | 738±51     | 737±58     | 612±42     |
| <b>PSI/PSII</b>                                | 152±9      | 162±9      | 138±10     | 177±12     | 191±15     | 311±21*    |
| <b>PSII</b>                                    | 3219±190   | 2170±124*  | 2432±175*  | 2885±199   | 3142±248*  | 3067±212   |
|                                                | 493±29     | 166±9*     | 238±17*    | 255±18     | 271±21     | 198±14     |
| <b>CP24-CP29</b>                               | 2469±146   | 2582±147   | 3266±235*  | 3239±223   | 3364±266   | 3968±274*  |
| <b>LHCII trimer</b>                            | 3557±210   | 3614±206   | 3790±273*  | 3959±273   | 3696±292   | 3878±261   |
| <b>LHCII monomer</b>                           | 19278±1137 | 21147±1205 | 19435±1399 | 22094±1524 | 20157±1592 | 20607±1422 |

MC – Megacomplexes; PSI/PSII – PSI-LHCI/PSII core dimer; PSII – PSII core monomer/Cytb<sub>6</sub>f; CP24-CP29 – PSII-CP24-CP29.

Supplementary Table S5b for Figure 5b

| Bands                                          | WT       |            |            | PsbS-KO  |            |               |
|------------------------------------------------|----------|------------|------------|----------|------------|---------------|
|                                                | Dark     | LL 10 min  | LL 1 h     | Dark     | LL 10 min  | LL 1 h        |
| <b>MC</b>                                      | 1380±95  | 1801±135*  | 7660±544** | 2050±139 | 3272±226*  | 8926±696**    |
| <b>C<sub>2</sub>S<sub>2</sub>M<sub>2</sub></b> | 0        | 0          | 4734±341   | 0        | 0          | oversaturated |
| <b>C<sub>2</sub>S<sub>2</sub>M</b>             | 2124±147 | 2048±154   | 4729±340** | 3545±241 | 5530±382** | oversaturated |
| <b>C<sub>2</sub>S<sub>2</sub></b>              | 4490±310 | 3660±275   | 4840±348   | 3810±259 | 6273±433** | oversaturated |
| <b>C<sub>2</sub>S</b>                          | 3996±276 | 3408±323   | 5132±370*  | 2872±195 | 4991±344*  | oversaturated |
| <b>PSI/PSII</b>                                | 124±9    | 166±12     | 1606±116** | 0        | 0          | 0             |
| <b>PSII</b>                                    | 0        | 767±58     | 3523±254** | 0        | 1029±71    | 3415±266**    |
|                                                | 0        | 0          | 0          | 0        | 0          | 8270±645      |
| <b>CP24-CP29</b>                               | 5738±396 | 8106±608** | 9922±714** | 3842±261 | 7089±489** | 2385±186*     |
| <b>LHCII trimer</b>                            | 0        | 0          | 1048±75    | 606±41   | 979±68*    | 18251±1424*   |
| <b>LHCII monomer</b>                           | 0        | 0          | 0          | 0        | 0          | *             |
|                                                | 0        | 0          | 0          | 0        | 0          | 2776±217      |

MC – Megacomplexes; PSI/PSII – PSI-LHCI/PSII core dimer; PSII – PSII core monomer/Cytb<sub>6</sub>f; CP24-CP29 – PSII-CP24-CP29.

Supplementary Table S6a for Figure 6a

| Bands                                          | WT         |            |            | PsbS-KO    |            |            |
|------------------------------------------------|------------|------------|------------|------------|------------|------------|
|                                                | Dark       | LL 10 min  | LL 1 h     | Dark       | LL 10 min  | LL 1 h     |
| <b>MC</b>                                      | 680±40     | 778±51     | 956±66*    | 622±39     | 930±63*    | 1156±84*   |
| <b>C<sub>2</sub>S<sub>2</sub>M<sub>2</sub></b> | 594±35     | 480±31     | 1080±75**  | 546±34     | 653±44     | 593±43     |
| <b>C<sub>2</sub>S<sub>2</sub>M</b>             | 724±43     | 940±52*    | 1303±90**  | 467±29     | 1302±89**  | 1309±96**  |
| <b>C<sub>2</sub>S<sub>2</sub></b>              | 1022±60    | 804±351*   | 1072±74    | 577±36     | 1148±78**  | 1022±75**  |
| <b>C<sub>2</sub>S</b>                          | 648±38     | 623±40     | 725±50*    | 588±36     | 776±53*    | 546±40     |
| <b>PSI/PSII</b>                                | 292±17     | 169±11     | 261±18     | 580±36     | 457±31     | 397±29     |
| <b>PSII</b>                                    | 2684±158   | 2109±137*  | 3035±209*  | 2343±145   | 3154±214*  | 3018±220*  |
|                                                | 265±16     | 339±2*2    | 291±20     | 389±24     | 565±38*    | 328±24     |
| <b>CP24-CP29</b>                               | 2950±174   | 2757±179   | 2714±187   | 3189±198   | 3325±226   | 3524±257*  |
| <b>LHCII trimer</b>                            | 360±21     | 461±30     | 999±69*    | 656±41     | 761±52     | 829±61*    |
| <b>LHCII monomer</b>                           | 3352±198   | 2636±171*  | 3179±219   | 2667±165   | 3169±215*  | 2677±195   |
| <b>MC</b>                                      | 19652±1159 | 17217±1119 | 15305±1056 | 20001±1240 | 16264±1106 | 16598±1212 |

MC – Megacomplexes; PSI/PSII – PSI-LHCI/PSII core dimer; PSII – PSII core monomer/Cytb<sub>6</sub>f; CP24-CP29 – PSII-CP24-CP29.

Supplementary Table S6b for Figure 6b

| Bands                                          | WT         |            |             | PsbS-KO   |            |             |
|------------------------------------------------|------------|------------|-------------|-----------|------------|-------------|
|                                                | Dark       | LL 10 min  | LL 1 h      | Dark      | LL 10 min  | LL 1 h      |
| <b>MC</b>                                      | 0          | 0          | 0           | 0         | 0          |             |
| <b>C<sub>2</sub>S<sub>2</sub>M<sub>2</sub></b> | 3247±237   | 3086±235   | 2987±242    | 4176±276  | 4996±345   | 3077±228*   |
| <b>C<sub>2</sub>S<sub>2</sub>M</b>             |            |            |             |           |            |             |
| <b>C<sub>2</sub>S<sub>2</sub></b>              | 7643±558   | 6689±508   | 8641±700    | 7494±495  | 6196±428*  | 6778±502    |
| <b>C<sub>2</sub>S</b>                          | 4207±307   | 3882±295   | 3701±300*   | 6677±441  | 3891±268*  | 4038±299*   |
| <b>PSI/PSII</b>                                | 555±41     | 738±56*    | 948±7*7     | 781±52    | 957±66     | 423±31*     |
| <b>PSII</b>                                    |            |            | 518±42      |           |            |             |
| <b>CP24-CP29</b>                               |            |            |             |           | 290±20     | 290±21      |
| <b>LHCII trimer</b>                            |            |            |             |           |            |             |
| <b>LHCII monomer</b>                           | 14175±1035 | 16358±1243 | 19414±1573* | 14433±953 | 15806±1091 | 16662±1233* |
|                                                | 414±30     | 752±57*    | 991±80*     | 339±22    | 1201±83**  | 292±22      |

MC – Megacomplexes; PSI/PSII – PSI-LHCI/PSII core dimer; PSII – PSII core monomer/Cytb<sub>6</sub>f; CP24-CP29 – PSII-CP24-CP29.
